# Supplementary material for: Optimizing the photocatalysis in ferromagnetic Bi6Fe1.9Co0.1Ti3O18 nanocrystal by morphology control
Source: Royal Society of Chemistry journal article supplement (doi:10.1039/c5ra07435e), 2015-01-01
Supplement: c5ra07435e1.pdf [file c5ra07435e1.pdf]

## Electronic supplementary information

Optimizing the photocatalysis in ferromagnetic  $\text{Bi}_6\text{Fe}_{1.9}\text{Co}_{0.1}\text{Ti}_3\text{O}_{18}$  nanocrystal by morphology controlling

Wen Ge,<sup>1</sup> Zhengping Fu,<sup>1,3</sup> Xiaoning Li,<sup>1</sup> Jianlin Wang,<sup>1</sup> Zhu Zhu,<sup>1</sup> Min Liu,<sup>1,3\*</sup> Ranran Peng<sup>1,3</sup> and Yalin Lu<sup>1,2,3,4\*</sup>

<sup>1</sup>CAS Key Laboratory of Materials for Energy Conversion; Department of Materials Science and Engineering, University of Science and Technology of China, Hefei 230026, P. R. China

<sup>2</sup>Hefei National Laboratory for Physical Sciences at the Microscale, University of Science and Technology of China, Hefei 230026, P. R. China

<sup>3</sup>Synergetic Innovation Center of Quantum Information & Quantum Physics, University of Science and Technology of China, Hefei 230026, P. R. China

<sup>4</sup>Laser Optics Research Center, Physics Department, United States Air Force Academy, Colorado 80840, USA

**The calculation method of {117} facets:**

We determined the {117} facets by the following method. The cell parameters of BFCTO-2.00 sample calculated from the refinement of the XRD pattern by using the Pawley method are  $a=5.680\text{\AA}$ ,  $b=5.407\text{\AA}$  and  $c=49.991\text{\AA}$ . From the SEM image and the laterally-viewed TEM image, the interfacial angle ( $\theta$ ) between the top parallel surface and the lateral surface was about  $61.5^\circ$  as shown in Fig. 2(c) and Fig. 3(c). Besides, the two top parallel surface could be indexed to (001) and (00 $\bar{1}$ ) facets, respectively. According to the SAED image (the insert of Fig. 3(f) in the manuscript) and the formula of interfacial angle of orthorhombic lattice,<sup>1</sup> we listed the interfacial angle ( $\theta$ ) between the top parallel {001} facets and the lateral {hkl} facets in Table 1. The  $\theta$  value of  $61.23^\circ$  is the nearest to  $61.5^\circ$ , therefore, the lateral surfaces were determined to be {117}.

$$\cos \theta = \frac{\frac{h_1 h_2}{a^2} + \frac{k_1 k_2}{b^2} + \frac{l_1 l_2}{c^2}}{\sqrt{\left(\frac{h_1^2}{a^2} + \frac{k_1^2}{b^2} + \frac{l_1^2}{c^2}\right)\left(\frac{h_2^2}{a^2} + \frac{k_2^2}{b^2} + \frac{l_2^2}{c^2}\right)}}$$

$$= \frac{2l_2}{\sqrt{310h_2^2 + 340k_2^2 + 4l_2^2}}$$

**Table 1** The interfacial angle ( $\theta$ ) between the top parallel {001} facets and the lateral {hkl} facets. (The  $61.23^\circ$  interfacial angle and corresponding facets are marked in green)

| the lateral surface (hkl) | the interfacial angle ( $\theta$ ) |
|---------------------------|------------------------------------|
| {111}                     | 85.51 °                            |
| {113}                     | 76.76 °                            |
| {115}                     | 68.58 °                            |
| <b>{117}</b>              | <b>61.23 °</b>                     |
| {119}                     | 54.78 °                            |
| {1111}                    | 49.21 °                            |
| {1113}                    | 44.44 °                            |
| {1115}                    | 40.36 °                            |
| {1117}                    | 36.86 °                            |
| {1119}                    | 33.86 °                            |
| {1121}                    | 31.26 °                            |
| {1123}                    | 29.00 °                            |
| {1125}                    | 27.02 °                            |
| {1127}                    | 25.27 °                            |
| {1129}                    | 23.73 °                            |

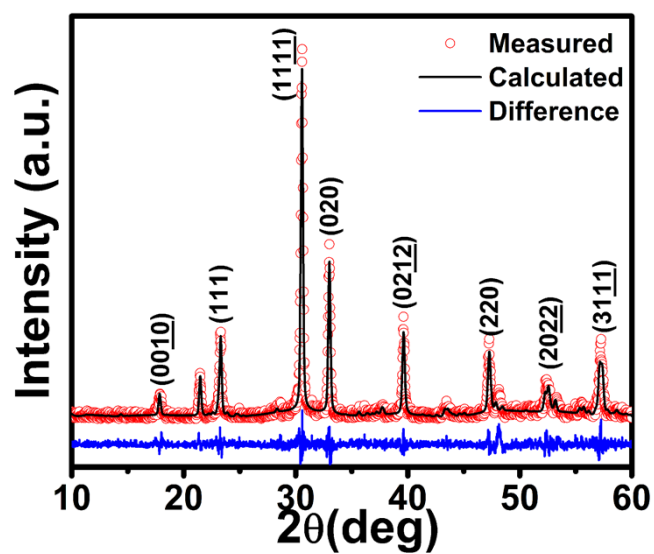

**Fig. S1** The refinement XRD patterns of BFCTO-2.00. Red circles indicate the experimental data and the calculated data are the continuous black line overlapping them. The lowest blue curve shows the difference between the experimental and calculated patterns.

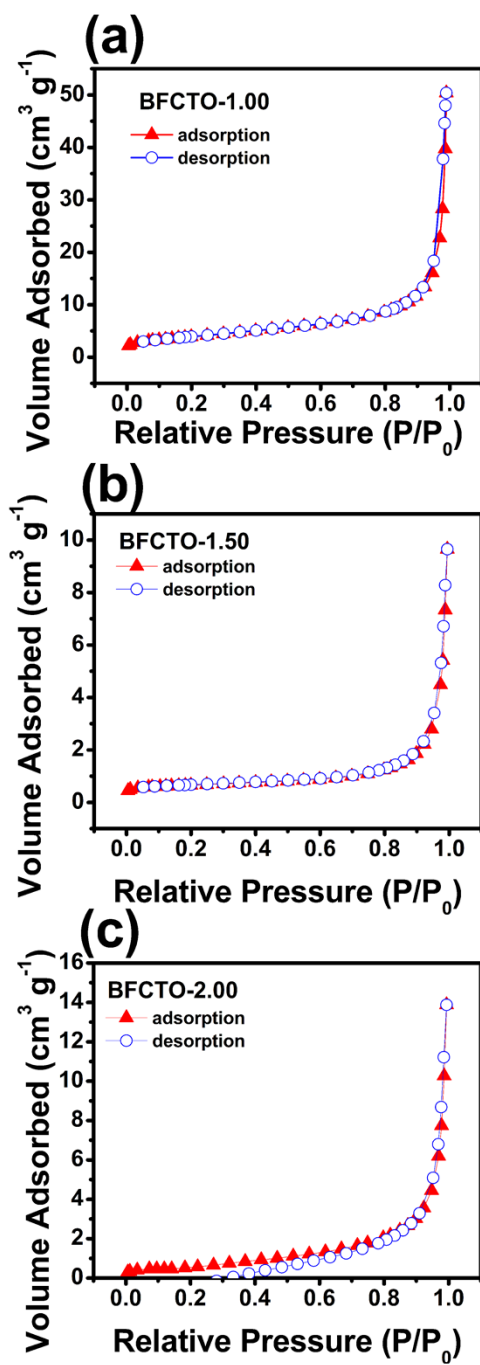

**Fig. S2** Nitrogen adsorption–desorption isotherms of (a) BFCTO-1.00, (b) BFCTO-1.50 and (c) BFCTO-2.00.

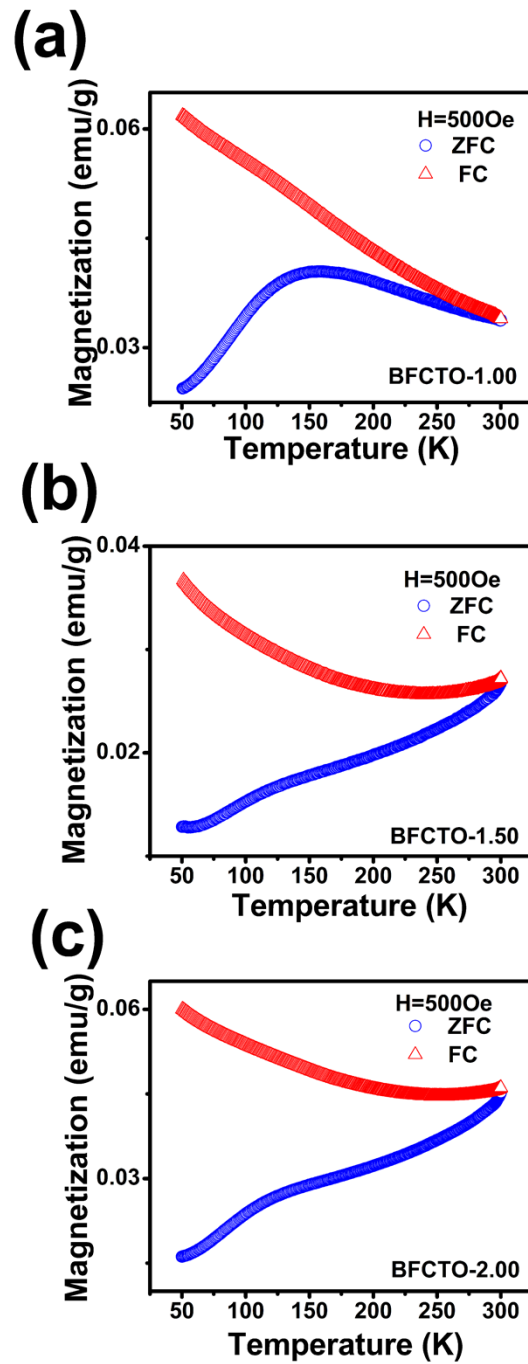

**Fig. S3** Zero-field-cooled (ZFC) and field-cooled (FC) magnetization curves of (a) BFCTO-1.00, (b) BFCTO-1.50 and (c) BFCTO-2.00 under a magnetic field of 500Oe.

**References:**

1. R. J. D. Tilley, *Crystals and crystal structures*, John Wiley & Sons, Ltd., 2006, p. 37.
